# Supplementary material
Source: PubMed Central journal article supplement (PMC4928132)
Supplement: Supp_Fig1.pdf [file Supp_Fig1.pdf]

## Supplementary Data

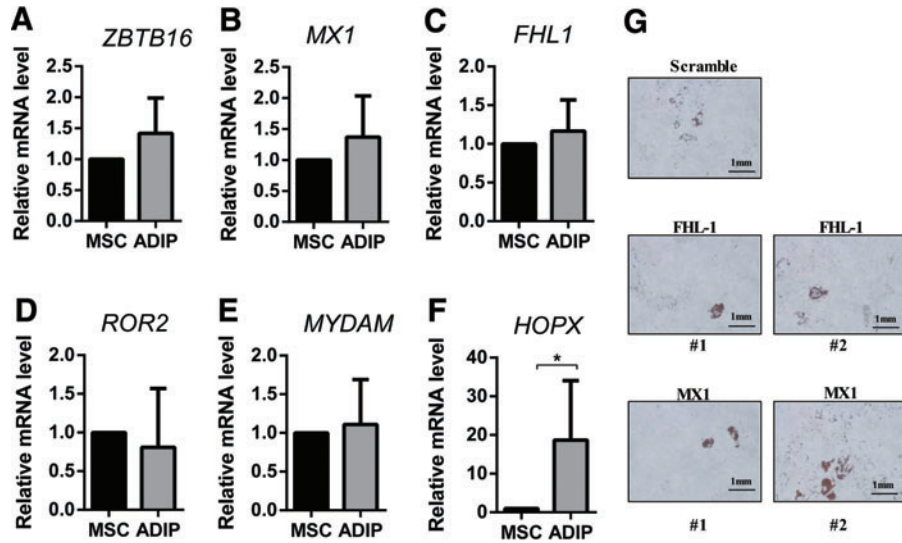

**SUPPLEMENTARY FIG. S1.** Expression of genes identified in bioinformatics analysis during adipogenic differentiation. (A–F) Real-time analysis of gene expression levels of EZH2 target genes, *ZBTB16*, *FHL1*, *MYADM*, *HOPX*, *ROR2*, and *MX1*, in MSC during adipogenic differentiation. (G) Representative images of Oil Red O staining of lipid containing adipocytes in cultures of *MX1*, *FHL1*, and control siRNA-treated MSC cultured under adipogenic inductive conditions. Mean values  $\pm$  SEM,  $n=3$  independent MSC donors (\* $P < 0.05$  paired  $t$ -test). EZH2, methyltransferase enhancer of zeste homolog 2; MSC, mesenchymal stem cell; SEM, standard error of the mean.
