# Supplementary material
Source: PubMed Central journal article supplement (PMC4928132)
Supplement: Supp_Fig3.pdf [file Supp_Fig3.pdf]

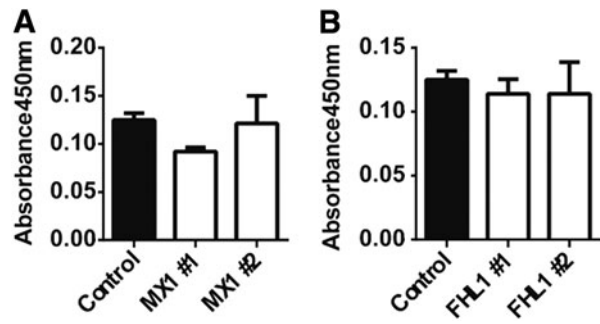

**SUPPLEMENTARY FIG. S3.** siRNA knockdown of MX1 and FHL1 has no effect on MSC proliferation. **(A)** MSC were treated with 12 pmol of negative control siRNA, MX1 siRNA #1, MX1 siRNA #2, FHL1 siRNA #1 or FHL1 siRNA #2. Proliferating MSC were analyzed by BrdU incorporation at day 6. **(B)** At 6 days of culture, the proliferation of MSC treated with either MX1 or FHL1. Mean values  $\pm$  SEM,  $n=3$  independent MSC donors (1-way ANOVA with Dunnett's multiple comparisons test).
